# Supplementary material for: Analytical Validation of a Highly Accurate and Reliable Next-Generation Sequencing-Based Urine Assay
Source: bioRxiv or medRxiv preprint supplement (doi:10.1101/2024.04.05.24305286), 2024-04-07
Supplement: Supplementary file [file media-1.pdf]

**Supplemental Table 1.** Summary of comparator assays used in this study

| Taxa                                | Target gene | Assay Type | Forward Primer Sequence         | Reverse Primer Sequence       | Probe Sequence            | Reference                  |
|-------------------------------------|-------------|------------|---------------------------------|-------------------------------|---------------------------|----------------------------|
| <i>Escherichia coli</i>             | uidA        | Taqman     | CGGAAGCAACGCGTAAACTC            | TGAGCGTCGCAGAACATTACA         | CGCGTCCGATCACCTGCGTC      | Silkie, et al., 2008       |
| <i>Klebsiella pneumoniae</i>        | khe         | Taqman     | GATGAAACGACCTGATTGCATTC         | CCGGGCTGTCCGGATAAG            | GCGAACTGGAAGGGCCCG        | Hartman, et al., 2009      |
| <i>Proteus mirabilis</i>            | ureR        | Taqman     | CCATCAGATTATGTCATTCAA           | GAGGAAAATGCAATTTATCTTTA       | CACACCCTACCCAACATTCATTCA  | Liu, et al., 2019          |
| <i>Enterococcus faecalis</i>        | 16S         | Taqman     | CGCTTCTTTCCCTCCGAGT             | GCCATGCGGCATAAATCG            | CAATTGGAAAGAGGAGTGGCGGACG | Santo Domingo et al., 2003 |
| <i>Staphylococcus aureus</i>        | ebp5        | Taqman     | CCACATGCCTTAATAATG              | GCGATTTTATTTCTTTGTAC          | ATGCCATGCCTCAAATATCGC     | Liu, et al., 2019          |
| <i>Gardnerella vaginalis</i>        | cpn60       | Taqman     | CGCATCTGCTAAGGATGTTG            | CAGCAATCTTTTCGCCAACT          | TGCAACTATTTCTGCAGCAGATCC  | Menard et al., 2008        |
| <i>Aerococcus urinae</i>            | 16S         | Taqman     | GACGGCTTTGCTGCTACTATCG          | GCTATGCATCATTGCTTGGTAG        | TGCATTAGCTCGTTGGTGGG      | Biotia                     |
| <i>Prevotella species</i>           | 16S         | SYBR green | GGTTCTGAGAGGAAGTCCCC            | TCCTGCACGCTACTTGGCTG          | NA                        | Stevenson and Weimer, 2007 |
| <i>Candida species</i>              | ITS         | Sanger     | TCCGTAGGTGAACCTGCGG             | TCCTCCGCTTATTGATATGC          | NA                        | White et al., 1990         |
| <i>Anaerococcus vaginalis</i>       | 16S         | Sanger     | TGATTTCTTCGGAATGAAATTAAGTGGATTA | GGTCATTTTATCATGCGATATTTGACTTT | NA                        | Biotia                     |
| <i>Corynebacterium urealyticum</i>  | 16S         | Sanger     | CCTGCTTGCAGGGTACTCGA            | CACCAACCACACTAAAGATTGGTC      | NA                        | Biotia                     |
| <i>Enterococcus faecium</i>         | 16S         | Sanger     | TTCTTTTTCCACCGGAGCTT            | AACCATGCGGTTTYGATTG           | NA                        | Ryu et al., 2013           |
| <i>Morganella morganii</i>          | 16S         | Sanger     | AGCTTGCTTCTGCTGACGAG            | GAGGCCCGAAGGTCCCCCG           | NA                        | Biotia                     |
| <i>Staphylococcus epidermidis</i>   | 16S         | Sanger     | GTTCAATAGTGAAAGACGGTTTTGCTGTC   | GTTTTACGATCCGAAGACCTTCATCAC   | NA                        | Biotia                     |
| <i>Staphylococcus saprophyticus</i> | 16S         | Sanger     | TAAAGTGAAAGATGTTTTGCTATC        | GTTTTACGAGCCGAAACCCTTCATCAC   | NA                        | Biotia                     |
| <i>Streptococcus agalactiae</i>     | 16S         | Sanger     | KGTTTGGTGTTCACACTAGACTG         | TTACCGTCACTTGGTAGATTTTCCA     | NA                        | Biotia                     |
| <i>Streptococcus anginosus</i>      | 16S         | Sanger     | CGTAGTTTACTACCCGTATTCTGTGA      | GTACCGTCACTGTGTGAAC           | NA                        | Biotia                     |

**Supplementary Table 2A.** Summary of Replicates Detected in the Reproducibility Studies

| <b>Microbial Species</b>      | <b>Replicates Detected</b> | <b>Qualitative Reproducibility</b> |
|-------------------------------|----------------------------|------------------------------------|
| <i>Enterococcus faecalis</i>  | 81/81                      | 100%                               |
| <i>Escherichia coli</i>       | 81/81                      | 100%                               |
| <i>Klebsiella pneumoniae</i>  | 81/81                      | 100%                               |
| <i>Proteus mirabilis</i>      | 81/81                      | 100%                               |
| <i>Staphylococcus aureus</i>  | 81/81                      | 100%                               |
| <i>Candida albicans</i>       | 45/45                      | 100%                               |
| <i>Candida auris</i>          | 45/45                      | 100%                               |
| <i>Candida glabrata</i>       | 45/45                      | 100%                               |
| <i>Candida krusei</i>         | 45/45                      | 100%                               |
| <i>Candida parapsilosis</i>   | 45/45                      | 100%                               |
| <i>Candida tropicalis</i>     | 45/45                      | 100%                               |
| <i>Candida dubliniensis</i>   | 9/9                        | 100%                               |
| <i>Candida guilliermondii</i> | 9/9                        | 100%                               |
| <i>Candida kefyr</i>          | 9/9                        | 100%                               |
| <i>Candida lusitanae</i>      | 9/9                        | 100%                               |
| <i>Negative</i>               | 42/42                      | 100%                               |

**Supplementary Table 2B. Reproducibility Studies Results by Concentration**

| Analyte                      | Strain     | Load    | Day 1 | Day 2 | Day 3 | Total |
|------------------------------|------------|---------|-------|-------|-------|-------|
| <i>Enterococcus faecalis</i> | URV-032-2  | 15,000  | 3/3   | 3/3   | 3/3   | 9/9   |
| <i>Escherichia coli</i>      | URV-012    | 15,000  | 3/3   | 3/3   | 3/3   | 9/9   |
| <i>Klebsiella pneumoniae</i> | URV-155-1  | 15,000  | 3/3   | 3/3   | 3/3   | 9/9   |
| <i>Proteus mirabilis</i>     | URV-023    | 15,000  | 3/3   | 3/3   | 3/3   | 9/9   |
| <i>Staphylococcus aureus</i> | ATCC-43300 | 15,000  | 3/3   | 3/3   | 3/3   | 9/9   |
| <i>Enterococcus faecalis</i> | URV-032-2  | 20,000  | 3/3   | 3/3   | 3/3   | 9/9   |
| <i>Escherichia coli</i>      | URV-012    | 20,000  | 3/3   | 3/3   | 3/3   | 9/9   |
| <i>Klebsiella pneumoniae</i> | URV-155-1  | 20,000  | 3/3   | 3/3   | 3/3   | 9/9   |
| <i>Proteus mirabilis</i>     | URV-023    | 20,000  | 3/3   | 3/3   | 3/3   | 9/9   |
| <i>Staphylococcus aureus</i> | ATCC-43300 | 20,000  | 3/3   | 3/3   | 3/3   | 9/9   |
| <i>Enterococcus faecalis</i> | URV-032-2  | 25,000  | 3/3   | 3/3   | 3/3   | 9/9   |
| <i>Escherichia coli</i>      | URV-012    | 25,000  | 3/3   | 3/3   | 3/3   | 9/9   |
| <i>Klebsiella pneumoniae</i> | URV-155-1  | 25,000  | 3/3   | 3/3   | 3/3   | 9/9   |
| <i>Proteus mirabilis</i>     | URV-023    | 25,000  | 3/3   | 3/3   | 3/3   | 9/9   |
| <i>Staphylococcus aureus</i> | ATCC-43300 | 25,000  | 3/3   | 3/3   | 3/3   | 9/9   |
| <i>Enterococcus faecalis</i> | URV-220    | 25,000  | 3/3   | 3/3   | 3/3   | 9/9   |
| <i>Escherichia coli</i>      | URV-005-1  | 25,000  | 3/3   | 3/3   | 3/3   | 9/9   |
| <i>Klebsiella pneumoniae</i> | URV-038    | 25,000  | 3/3   | 3/3   | 3/3   | 9/9   |
| <i>Proteus mirabilis</i>     | URV-010    | 25,000  | 3/3   | 3/3   | 3/3   | 9/9   |
| <i>Staphylococcus aureus</i> | SJF-038    | 25,000  | 3/3   | 3/3   | 3/3   | 9/9   |
| <i>Enterococcus faecalis</i> | URV-032-2  | 25,000  | 3/3   | 3/3   | 3/3   | 9/9   |
| <i>Escherichia coli</i>      | URV-012    | 25,000  | 3/3   | 3/3   | 3/3   | 9/9   |
| <i>Klebsiella pneumoniae</i> | URV-036    | 25,000  | 3/3   | 3/3   | 3/3   | 9/9   |
| <i>Proteus mirabilis</i>     | URV-014    | 25,000  | 3/3   | 3/3   | 3/3   | 9/9   |
| <i>Staphylococcus aureus</i> | SJF-044    | 25,000  | 3/3   | 3/3   | 3/3   | 9/9   |
| <i>Enterococcus faecalis</i> | URV-007    | 25,000  | 3/3   | 3/3   | 3/3   | 9/9   |
| <i>Escherichia coli</i>      | URV-029    | 25,000  | 3/3   | 3/3   | 3/3   | 9/9   |
| <i>Klebsiella pneumoniae</i> | URV-022    | 25,000  | 3/3   | 3/3   | 3/3   | 9/9   |
| <i>Proteus mirabilis</i>     | URV-040    | 25,000  | 3/3   | 3/3   | 3/3   | 9/9   |
| <i>Staphylococcus aureus</i> | SJF-034    | 25,000  | 3/3   | 3/3   | 3/3   | 9/9   |
| <i>Enterococcus faecalis</i> | URV-026    | 25,000  | 3/3   | 3/3   | 3/3   | 9/9   |
| <i>Escherichia coli</i>      | URV-006    | 25,000  | 3/3   | 3/3   | 3/3   | 9/9   |
| <i>Klebsiella pneumoniae</i> | URV-031    | 25,000  | 3/3   | 3/3   | 3/3   | 9/9   |
| <i>Proteus mirabilis</i>     | URV-060    | 25,000  | 3/3   | 3/3   | 3/3   | 9/9   |
| <i>Staphylococcus aureus</i> | SJF-035    | 25,000  | 3/3   | 3/3   | 3/3   | 9/9   |
| <i>Enterococcus faecalis</i> | URV-261    | 25,000  | 3/3   | 3/3   | 3/3   | 9/9   |
| <i>Escherichia coli</i>      | URV-021    | 25,000  | 3/3   | 3/3   | 3/3   | 9/9   |
| <i>Klebsiella pneumoniae</i> | URV-155-1  | 25,000  | 3/3   | 3/3   | 3/3   | 9/9   |
| <i>Proteus mirabilis</i>     | URV-016    | 25,000  | 3/3   | 3/3   | 3/3   | 9/9   |
| <i>Staphylococcus aureus</i> | SJF-041    | 25,000  | 3/3   | 3/3   | 3/3   | 9/9   |
| <i>Enterococcus faecalis</i> | URV-032-2  | 100,000 | 3/3   | 3/3   | 3/3   | 9/9   |
| <i>Escherichia coli</i>      | AR-104     | 100,000 | 3/3   | 3/3   | 3/3   | 9/9   |
| <i>Klebsiella pneumoniae</i> | AR-557     | 100,000 | 3/3   | 3/3   | 3/3   | 9/9   |
| <i>Proteus mirabilis</i>     | AR-156     | 100,000 | 3/3   | 3/3   | 3/3   | 9/9   |
| <i>Staphylococcus aureus</i> | SJF-035    | 100,000 | 3/3   | 3/3   | 3/3   | 9/9   |
| <i>Candida albicans</i>      | 60193      | 25,000  | 3/3   | 3/3   | 3/3   | 9/9   |
| <i>Candida auris</i>         | MYA-5000   | 25,000  | 3/3   | 3/3   | 3/3   | 9/9   |
| <i>Candida glabrata</i>      | 15126      | 25,000  | 3/3   | 3/3   | 3/3   | 9/9   |
| <i>Candida krusei</i>        | 14243      | 25,000  | 3/3   | 3/3   | 3/3   | 9/9   |
| <i>Candida parapsilosis</i>  | 22019      | 25,000  | 3/3   | 3/3   | 3/3   | 9/9   |
| <i>Candida tropicalis</i>    | 1369       | 25,000  | 3/3   | 3/3   | 3/3   | 9/9   |

|                               |            |        |       |       |       |       |
|-------------------------------|------------|--------|-------|-------|-------|-------|
| <i>Candida albicans</i>       | 10231      | 25,000 | 3/3   | 3/3   | 3/3   | 9/9   |
| <i>Candida auris</i>          | MYA-5001   | 25,000 | 3/3   | 3/3   | 3/3   | 9/9   |
| <i>Candida glabrata</i>       | 2001       | 25,000 | 3/3   | 3/3   | 3/3   | 9/9   |
| <i>Candida krusei</i>         | 34135      | 25,000 | 3/3   | 3/3   | 3/3   | 9/9   |
| <i>Candida parapsilosis</i>   | 90018      | 25,000 | 3/3   | 3/3   | 3/3   | 9/9   |
| <i>Candida tropicalis</i>     | 1369       | 25,000 | 3/3   | 3/3   | 3/3   | 9/9   |
| <i>Candida albicans</i>       | 14053      | 25,000 | 3/3   | 3/3   | 3/3   | 9/9   |
| <i>Candida auris</i>          | MYA-5002   | 25,000 | 3/3   | 3/3   | 3/3   | 9/9   |
| <i>Candida glabrata</i>       | 66032      | 25,000 | 3/3   | 3/3   | 3/3   | 9/9   |
| <i>Candida krusei</i>         | 90878      | 25,000 | 3/3   | 3/3   | 3/3   | 9/9   |
| <i>Candida parapsilosis</i>   | SJF-019    | 25,000 | 3/3   | 3/3   | 3/3   | 9/9   |
| <i>Candida tropicalis</i>     | 750        | 25,000 | 3/3   | 3/3   | 3/3   | 9/9   |
| <i>Candida albicans</i>       | 90029      | 25,000 | 3/3   | 3/3   | 3/3   | 9/9   |
| <i>Candida auris</i>          | MYA-5003   | 25,000 | 3/3   | 3/3   | 3/3   | 9/9   |
| <i>Candida glabrata</i>       | 90030      | 25,000 | 3/3   | 3/3   | 3/3   | 9/9   |
| <i>Candida krusei</i>         | 6258       | 25,000 | 3/3   | 3/3   | 3/3   | 9/9   |
| <i>Candida parapsilosis</i>   | SJF-032    | 25,000 | 3/3   | 3/3   | 3/3   | 9/9   |
| <i>Candida tropicalis</i>     | 13803      | 25,000 | 3/3   | 3/3   | 3/3   | 9/9   |
| <i>Candida albicans</i>       | URV-018    | 25,000 | 3/3   | 3/3   | 3/3   | 9/9   |
| <i>Candida auris</i>          | CDC B11903 | 25,000 | 3/3   | 3/3   | 3/3   | 9/9   |
| <i>Candida glabrata</i>       | MYA-2950   | 25,000 | 3/3   | 3/3   | 3/3   | 9/9   |
| <i>Candida krusei</i>         | URV-019    | 25,000 | 3/3   | 3/3   | 3/3   | 9/9   |
| <i>Candida parapsilosis</i>   | SJF-033    | 25,000 | 3/3   | 3/3   | 3/3   | 9/9   |
| <i>Candida tropicalis</i>     | 66029      | 25,000 | 3/3   | 3/3   | 3/3   | 9/9   |
| <i>Candida dubliniensis</i>   | 3949       | 25,000 | 3/3   | 3/3   | 3/3   | 9/9   |
| <i>Candida guilliermondii</i> | 6260       | 25,000 | 3/3   | 3/3   | 3/3   | 9/9   |
| <i>Candida kefyr</i>          | 66028      | 25,000 | 3/3   | 3/3   | 3/3   | 9/9   |
| <i>Candida lusitanae</i>      | 34449      | 25,000 | 3/3   | 3/3   | 3/3   | 9/9   |
| Negative Samples              | -          | -      | 14/14 | 14/14 | 14/14 | 42/42 |

**Supplementary Table 3A.** Performance Characteristics of in silico Studies per Key Urogenital Taxa

| Key pathogen                      | Method    | TP | TN   | FN | FP | Total | Sensitivity | Specificity |
|-----------------------------------|-----------|----|------|----|----|-------|-------------|-------------|
| <i>Escherichia coli</i>           | Clinical  |    |      |    |    |       |             |             |
|                                   | Contrived |    |      |    |    |       |             |             |
|                                   | in silico | 3  | 8239 | 0  | 24 | 8266  | 100.0%      | 99.7%       |
|                                   | Total     |    |      |    |    |       |             |             |
| <i>Klebsiella pneumoniae</i>      | Clinical  |    |      |    |    |       |             |             |
|                                   | Contrived |    |      |    |    |       |             |             |
|                                   | in silico | 3  | 8250 | 0  | 13 | 8266  | 100.0%      | 99.8%       |
|                                   | Total     |    |      |    |    |       |             |             |
| <i>Proteus mirabilis</i>          | Clinical  |    |      |    |    |       |             |             |
|                                   | Contrived |    |      |    |    |       |             |             |
|                                   | in silico | 3  | 8255 | 0  | 8  | 8266  | 100.0%      | 99.9%       |
|                                   | Total     |    |      |    |    |       |             |             |
| <i>Enterococcus faecalis</i>      | Clinical  |    |      |    |    |       |             |             |
|                                   | Contrived |    |      |    |    |       |             |             |
|                                   | in silico | 3  | 8263 | 0  | 0  | 8266  | 100.0%      | 100.0%      |
|                                   | Total     |    |      |    |    |       |             |             |
| <i>Staphylococcus aureus</i>      | Clinical  |    |      |    |    |       |             |             |
|                                   | Contrived |    |      |    |    |       |             |             |
|                                   | in silico | 3  | 8252 | 0  | 11 | 8266  | 100.0%      | 99.9%       |
|                                   | Total     |    |      |    |    |       |             |             |
| <i>Citrobacter species</i>        | Clinical  |    |      |    |    |       |             |             |
|                                   | Contrived |    |      |    |    |       |             |             |
|                                   | in silico | 20 | 8246 | 0  | 0  | 8266  | 100.0%      | 100.0%      |
|                                   | Total     |    |      |    |    |       |             |             |
| <i>Enterobacter aerogenes</i>     | Clinical  |    |      |    |    |       |             |             |
|                                   | Contrived |    |      |    |    |       |             |             |
|                                   | in silico | 3  | 8263 | 0  | 0  | 8266  | 100.0%      | 100.0%      |
|                                   | Total     |    |      |    |    |       |             |             |
| <i>Enterobacter cloacae</i>       | Clinical  |    |      |    |    |       |             |             |
|                                   | Contrived |    |      |    |    |       |             |             |
|                                   | in silico | 3  | 8253 | 0  | 10 | 8266  | 100.0%      | 99.9%       |
|                                   | Total     |    |      |    |    |       |             |             |
| <i>Klebsiella variicola</i>       | Clinical  |    |      |    |    |       |             |             |
|                                   | Contrived |    |      |    |    |       |             |             |
|                                   | in silico | 3  | 8260 | 0  | 3  | 8266  | 100.0%      | 100.0%      |
|                                   | Total     |    |      |    |    |       |             |             |
| <i>Klebsiella oxytoca</i>         | Clinical  |    |      |    |    |       |             |             |
|                                   | Contrived |    |      |    |    |       |             |             |
|                                   | in silico | 3  | 8260 | 0  | 3  | 8266  | 100.0%      | 100.0%      |
|                                   | Total     |    |      |    |    |       |             |             |
| <i>Morganella morganii</i>        | Clinical  |    |      |    |    |       |             |             |
|                                   | Contrived |    |      |    |    |       |             |             |
|                                   | in silico | 3  | 8262 | 0  | 1  | 8266  | 100.0%      | 100.0%      |
|                                   | Total     |    |      |    |    |       |             |             |
| <i>Proteus vulgaris</i>           | Clinical  |    |      |    |    |       |             |             |
|                                   | Contrived |    |      |    |    |       |             |             |
|                                   | in silico | 3  | 8256 | 0  | 7  | 8266  | 100.0%      | 99.9%       |
|                                   | Total     |    |      |    |    |       |             |             |
| <i>Providencia rettgeri</i>       | Clinical  |    |      |    |    |       |             |             |
|                                   | Contrived |    |      |    |    |       |             |             |
|                                   | in silico | 3  | 8260 | 0  | 3  | 8266  | 100.0%      | 100.0%      |
|                                   | Total     |    |      |    |    |       |             |             |
| <i>Providencia stuartii</i>       | Clinical  |    |      |    |    |       |             |             |
|                                   | Contrived |    |      |    |    |       |             |             |
|                                   | in silico | 3  | 8260 | 0  | 3  | 8266  | 100.0%      | 100.0%      |
|                                   | Total     |    |      |    |    |       |             |             |
| <i>Raoultella ornithinolytica</i> | Clinical  |    |      |    |    |       |             |             |
|                                   | Contrived |    |      |    |    |       |             |             |
|                                   | in silico | 3  | 8260 | 0  | 3  | 8266  | 100.0%      | 100.0%      |
|                                   | Total     |    |      |    |    |       |             |             |
| <i>Serratia marcescens</i>        | Clinical  |    |      |    |    |       |             |             |
|                                   | Contrived |    |      |    |    |       |             |             |
|                                   | in silico | 3  | 8245 | 0  | 18 | 8266  | 100.0%      | 99.8%       |
|                                   | Total     |    |      |    |    |       |             |             |
| <i>Acinetobacter baumannii</i>    | Clinical  |    |      |    |    |       |             |             |
|                                   | Contrived |    |      |    |    |       |             |             |
|                                   | in silico | 3  | 8244 | 0  | 19 | 8266  | 100.0%      | 99.8%       |
|                                   | Total     |    |      |    |    |       |             |             |

|                                     |           |      |      |   |    |      |        |        |
|-------------------------------------|-----------|------|------|---|----|------|--------|--------|
| <i>Acinetobacter lwoffii</i>        | Clinical  |      |      |   |    |      |        |        |
|                                     | Contrived |      |      |   |    |      |        |        |
|                                     | in silico | 3    | 8260 | 0 | 3  | 8266 | 100.0% | 100.0% |
|                                     | Total     |      |      |   |    |      |        |        |
| <i>Pseudomonas aeruginosa</i>       | Clinical  |      |      |   |    |      |        |        |
|                                     | Contrived |      |      |   |    |      |        |        |
|                                     | in silico | 3    | 8260 | 0 | 3  | 8266 | 100.0% | 100.0% |
|                                     | Total     |      |      |   |    |      |        |        |
| <i>Streptrophomonas maltophilia</i> | Clinical  |      |      |   |    |      |        |        |
|                                     | Contrived |      |      |   |    |      |        |        |
|                                     | in silico | 3    | 8252 | 0 | 11 | 8266 | 100.0% | 99.9%  |
|                                     | Total     |      |      |   |    |      |        |        |
| <i>Aerococcus species</i>           | Clinical  |      |      |   |    |      |        |        |
|                                     | Contrived |      |      |   |    |      |        |        |
|                                     | in silico | 21   | 8242 | 3 | 0  | 8266 | 87.5%  | 100.0% |
|                                     | Total     |      |      |   |    |      |        |        |
| Anginosus group Streptococci        | Clinical  |      |      |   |    |      |        |        |
|                                     | Contrived |      |      |   |    |      |        |        |
|                                     | in silico | 5    | 8261 | 0 | 0  | 8266 | 100.0% | 100.0% |
|                                     | Total     |      |      |   |    |      |        |        |
| <i>Streptococcus agalactiae</i>     | Clinical  |      |      |   |    |      |        |        |
|                                     | Contrived |      |      |   |    |      |        |        |
|                                     | in silico | 3    | 8263 | 0 | 0  | 8266 | 100.0% | 100.0% |
|                                     | Total     |      |      |   |    |      |        |        |
| <i>Enterococcus faecium</i>         | Clinical  |      |      |   |    |      |        |        |
|                                     | Contrived |      |      |   |    |      |        |        |
|                                     | in silico | 3    | 8260 | 0 | 3  | 8266 | 100.0% | 100.0% |
|                                     | Total     |      |      |   |    |      |        |        |
| <i>Corynebacterium urealyticum</i>  | Clinical  |      |      |   |    |      |        |        |
|                                     | Contrived |      |      |   |    |      |        |        |
|                                     | in silico | 3    | 8263 | 0 | 0  | 8266 | 100.0% | 100.0% |
|                                     | Total     |      |      |   |    |      |        |        |
| <i>Staphylococcus epidermidis</i>   | Clinical  |      |      |   |    |      |        |        |
|                                     | Contrived |      |      |   |    |      |        |        |
|                                     | in silico | 3    | 8263 | 0 | 0  | 8266 | 100.0% | 100.0% |
|                                     | Total     |      |      |   |    |      |        |        |
| <i>Staphylococcus lugdunensis</i>   | Clinical  |      |      |   |    |      |        |        |
|                                     | Contrived |      |      |   |    |      |        |        |
|                                     | in silico | 3    | 8263 | 0 | 0  | 8266 | 100.0% | 100.0% |
|                                     | Total     |      |      |   |    |      |        |        |
| <i>Staphylococcus saprophyticus</i> | Clinical  |      |      |   |    |      |        |        |
|                                     | Contrived |      |      |   |    |      |        |        |
|                                     | in silico | 3    | 8263 | 0 | 0  | 8266 | 100.0% | 100.0% |
|                                     | Total     |      |      |   |    |      |        |        |
| Mitis group Streptococci            | Clinical  |      |      |   |    |      |        |        |
|                                     | Contrived |      |      |   |    |      |        |        |
|                                     | in silico | 3    | 8262 | 0 | 1  | 8266 | 100.0% | 100.0% |
|                                     | Total     |      |      |   |    |      |        |        |
| <i>Anaerococcus vaginalis</i>       | Clinical  |      |      |   |    |      |        |        |
|                                     | Contrived |      |      |   |    |      |        |        |
|                                     | in silico | 3    | 8263 | 0 | 0  | 8266 | 100.0% | 100.0% |
|                                     | Total     |      |      |   |    |      |        |        |
| <i>Bacteroides fragilis</i>         | Clinical  |      |      |   |    |      |        |        |
|                                     | Contrived |      |      |   |    |      |        |        |
|                                     | in silico | 3    | 8263 | 0 | 0  | 8266 | 100.0% | 100.0% |
|                                     | Total     |      |      |   |    |      |        |        |
| <i>Prevotella species</i>           | Clinical  |      |      |   |    |      |        |        |
|                                     | Contrived |      |      |   |    |      |        |        |
|                                     | in silico | 9    | 8257 | 0 | 0  | 8266 | 100.0% | 100.0% |
|                                     | Total     |      |      |   |    |      |        |        |
| <i>Gardnerella vaginalis</i>        | Clinical  |      |      |   |    |      |        |        |
|                                     | Contrived |      |      |   |    |      |        |        |
|                                     | in silico | 3    | 8263 | 0 | 0  | 8266 | 100.0% | 100.0% |
|                                     | Total     |      |      |   |    |      |        |        |
| Negative Organisms*                 | Contrived |      |      |   |    |      |        |        |
|                                     | in silico | 7977 | 289  | 0 | 0  | 8266 | 100.0% | 100.0% |
|                                     | Total     |      |      |   |    |      |        |        |

Supplementary Table 3B. Performance Characteristics of in silico Studies per Key Fungal Urogenital Taxa

| Key pathogen                  | Method           | TP   | TN   | FN | FP | Total | Sensitivity | Specificity |
|-------------------------------|------------------|------|------|----|----|-------|-------------|-------------|
| <i>Candida albicans</i>       | Clinical         |      |      |    |    |       |             |             |
|                               | Contrived        |      |      |    |    |       |             |             |
|                               | <i>in silico</i> | 9    | 4133 | 0  | 0  | 4142  | 100.0%      | 100.0%      |
|                               | Total            |      |      |    |    |       |             |             |
| <i>Candida auris</i>          | Clinical         |      |      |    |    |       |             |             |
|                               | Contrived        |      |      |    |    |       |             |             |
|                               | <i>in silico</i> | 9    | 4133 | 0  | 0  | 4142  | 100.0%      | 100.0%      |
|                               | Total            |      |      |    |    |       |             |             |
| <i>Candida dubliniensis</i>   | Clinical         |      |      |    |    |       |             |             |
|                               | Contrived        |      |      |    |    |       |             |             |
|                               | <i>in silico</i> | 9    | 4133 | 0  | 0  | 4142  | 100.0%      | 100.0%      |
|                               | Total            |      |      |    |    |       |             |             |
| <i>Candida glabrata</i>       | Clinical         |      |      |    |    |       |             |             |
|                               | Contrived        |      |      |    |    |       |             |             |
|                               | <i>in silico</i> | 9    | 4133 | 0  | 0  | 4142  | 100.0%      | 100.0%      |
|                               | Total            |      |      |    |    |       |             |             |
| <i>Candida guilliermondii</i> | Clinical         |      |      |    |    |       |             |             |
|                               | Contrived        |      |      |    |    |       |             |             |
|                               | <i>in silico</i> | 9    | 4133 | 0  | 0  | 4142  | 100.0%      | 100.0%      |
|                               | Total            |      |      |    |    |       |             |             |
| <i>Candida kefyr</i>          | Clinical         |      |      |    |    |       |             |             |
|                               | Contrived        |      |      |    |    |       |             |             |
|                               | <i>in silico</i> | 9    | 4133 | 0  | 0  | 4142  | 100.0%      | 100.0%      |
|                               | Total            |      |      |    |    |       |             |             |
| <i>Candida krusei</i>         | Clinical         |      |      |    |    |       |             |             |
|                               | Contrived        |      |      |    |    |       |             |             |
|                               | <i>in silico</i> | 9    | 4133 | 0  | 0  | 4142  | 100.0%      | 100.0%      |
|                               | Total            |      |      |    |    |       |             |             |
| <i>Candida lusitanae</i>      | Clinical         |      |      |    |    |       |             |             |
|                               | Contrived        |      |      |    |    |       |             |             |
|                               | <i>in silico</i> | 9    | 4133 | 0  | 0  | 4142  | 100.0%      | 100.0%      |
|                               | Total            |      |      |    |    |       |             |             |
| <i>Candida parapsilopsis</i>  | Clinical         |      |      |    |    |       |             |             |
|                               | Contrived        |      |      |    |    |       |             |             |
|                               | <i>in silico</i> | 9    | 4133 | 0  | 0  | 4142  | 100.0%      | 100.0%      |
|                               | Total            |      |      |    |    |       |             |             |
| <i>Candida tropicalis</i>     | Clinical         |      |      |    |    |       |             |             |
|                               | Contrived        |      |      |    |    |       |             |             |
|                               | <i>in silico</i> | 9    | 4133 | 0  | 0  | 4142  | 100.0%      | 100.0%      |
|                               | Total            |      |      |    |    |       |             |             |
| Negative Organisms*           | Contrived        |      |      |    |    |       |             |             |
|                               | <i>in silico</i> | 4052 | 90   | 0  | 0  | 4142  | 100.0%      | 100.0%      |
|                               | Total            |      |      |    |    |       |             |             |

**Supplementary Table 4.** Summary of *in silico* study cross reactive species

| Analyte                               | # of samples | Cross reactive species                |
|---------------------------------------|--------------|---------------------------------------|
| <i>Acinetobacter baumannii</i>        | 19           | <i>Acinetobacter genomosp</i>         |
| <i>Acinetobacter lwoffii</i>          | 3            | <i>Acinetobacter pseudolwoffii</i>    |
| <i>Enterobacter cloacae</i>           | 10           | <i>Enterobacter chengduensis</i>      |
| <i>Enterococcus faecium</i>           | 3            | <i>Enterococcus lactis</i>            |
| <i>Escherichia coli</i>               | 48           | <i>Escherichia marmotae</i>           |
| <i>Klebsiella oxytoca</i>             | 3            | <i>Klebsiella grimontii</i>           |
| <i>Klebsiella pneumoniae</i>          | 13           | <i>Klebsiella quasipneumoniae</i>     |
| <i>Klebsiella variicola</i>           | 3            | <i>Klebsiella quasivariicola</i>      |
| <i>Morganella morganii</i>            | 1            | <i>Morganella psychrotolerans</i>     |
| <i>Proteus mirabilis</i>              | 8            | <i>Proteus penneri</i>                |
| <i>Proteus vulgaris</i>               | 7            | <i>Proteus faecis</i>                 |
| <i>Providencia rettgeri</i>           | 3            | <i>Providencia huaxiensis</i>         |
| <i>Providencia stuartii</i>           | 3            | <i>Providencia thailandensis</i>      |
| <i>Pseudomonas aeruginosa</i>         | 3            | <i>Pseudomonas paraeruginosa</i>      |
| <i>Raoultella ornithinolytica</i>     | 3            | <i>Raoultella planticola</i>          |
| <i>Serratia marcescens</i>            | 18           | <i>Serratia nematodiphila</i>         |
| <i>Staphylococcus aureus</i>          | 11           | <i>Staphylococcus roterodami</i>      |
| <i>Stenotrophomonas maltophilia</i>   | 11           | <i>Stenotrophomonas indicatrix</i>    |
| <i>Streptococcus mitis</i>            | 1            | <i>Streptococcus pseudopneumoniae</i> |
| Simulated Reads Species               | # of samples | Cross reactive species                |
| <i>Proteus vulgaris</i>               | 2            | <i>Proteus terrae</i>                 |
| <i>Serratia nematodiphila</i>         | 1            | <i>Serratia ureilytica</i>            |
| <i>Streptococcus pseudopneumoniae</i> | 1            | <i>Streptococcus pneumoniae</i>       |
| <i>Staphylococcus singaporensis</i>   | 3            | <i>Staphylococcus haemolyticus</i>    |



**Supplementary Table 5.** Comparator testing was used to resolve discrepancies between the BIOTIA-DX and culture. A combination of qPCR assays and Sanger sequencing were used for resolving such discrepancies. Assays are summarized in Supplementary Table 1.

| qPCR Comparator Testing Results |                              |                        |                    |                  |                   |               |                |
|---------------------------------|------------------------------|------------------------|--------------------|------------------|-------------------|---------------|----------------|
| Sample                          | Analyte                      | Prediction Probability | Relative abundance | Biotia-ID Result | Comparator result | qPCR Ct value | Outcome        |
| URV-104                         | <i>Enterococcus faecalis</i> | 0.988                  | 0.198              | Detected         | Detected          | 16.07         | True Positive  |
| URV-110                         | <i>Enterococcus faecalis</i> | 0.999                  | 0.135              | Detected         | Detected          | 15.79         | True Positive  |
| URV-118                         | <i>Enterococcus faecalis</i> | 0.999                  | 0.215              | Detected         | Detected          | 24.00         | True Positive  |
| URV-122                         | <i>Enterococcus faecalis</i> | 0.972                  | 0.081              | Detected         | Detected          | 16.76         | True Positive  |
| URV-127                         | <i>Enterococcus faecalis</i> | 0.998                  | 0.021              | Detected         | Detected          | 21.29         | True Positive  |
| URV-130                         | <i>Enterococcus faecalis</i> | 0.972                  | 0.179              | Detected         | Detected          | 19.99         | True Positive  |
| URV-132                         | <i>Enterococcus faecalis</i> | 0.999                  | 0.398              | Detected         | Detected          | 27.53         | True Positive  |
| URV-133                         | <i>Enterococcus faecalis</i> | 0.962                  | 0.019              | Detected         | Detected          | 25.07         | True Positive  |
| URV-134                         | <i>Enterococcus faecalis</i> | 0.984                  | 0.008              | Detected         | Detected          | 19.91         | True Positive  |
| URV-137                         | <i>Enterococcus faecalis</i> | 0.999                  | 0.120              | Detected         | Detected          | 24.43         | True Positive  |
| URV-139                         | <i>Enterococcus faecalis</i> | 0.595                  | 0.012              | Detected         | Not_detected      | Undetermined  | False Positive |
| URV-146                         | <i>Enterococcus faecalis</i> | 0.999                  | 0.041              | Detected         | Detected          | 17.30         | True Positive  |
| URV-157                         | <i>Enterococcus faecalis</i> | 0.999                  | 0.384              | Detected         | Detected          | 16.81         | True Positive  |
| URV-163                         | <i>Enterococcus faecalis</i> | 0.999                  | 0.739              | Detected         | Detected          | 13.77         | True Positive  |
| URV-170                         | <i>Enterococcus faecalis</i> | 0.999                  | 0.194              | Detected         | Detected          | 21.68         | True Positive  |
| URV-172                         | <i>Enterococcus faecalis</i> | 0.999                  | 0.279              | Detected         | Detected          | 18.98         | True Positive  |
| URV-176                         | <i>Enterococcus faecalis</i> | 0.999                  | 0.090              | Detected         | Detected          | 17.53         | True Positive  |
| URV-180                         | <i>Enterococcus faecalis</i> | 0.999                  | 0.575              | Detected         | Detected          | 21.81         | True Positive  |
| URV-181                         | <i>Enterococcus faecalis</i> | 0.963                  | 0.989              | Detected         | Detected          | 14.67         | True Positive  |
| URV-182                         | <i>Enterococcus faecalis</i> | 0.999                  | 0.155              | Detected         | Detected          | 16.58         | True Positive  |
| URV-184                         | <i>Enterococcus faecalis</i> | 0.676                  | 0.013              | Detected         | Detected          | 27.10         | True Positive  |
| URV-190                         | <i>Enterococcus faecalis</i> | 0.999                  | 0.061              | Detected         | Detected          | 19.73         | True Positive  |
| URV-220                         | <i>Enterococcus faecalis</i> | 0.982                  | 0.805              | Detected         | Detected          | 15.03         | True Positive  |
| URV-226                         | <i>Enterococcus faecalis</i> | 0.999                  | 0.663              | Detected         | Detected          | 14.43         | True Positive  |
| URV-227                         | <i>Enterococcus faecalis</i> | 0.998                  | 0.021              | Detected         | Detected          | 26.06         | True Positive  |
| URV-232                         | <i>Enterococcus faecalis</i> | 0.999                  | 0.305              | Detected         | Detected          | 21.34         | True Positive  |
| URV-248                         | <i>Enterococcus faecalis</i> | 0.999                  | 0.924              | Detected         | Detected          | 16.66         | True Positive  |
| URV-258                         | <i>Enterococcus faecalis</i> | 0.115                  | 0.001              | Not detected     | Detected          | 24.59         | False Negative |
| URV-259                         | <i>Enterococcus faecalis</i> | 0.402                  | 0.013              | Not detected     | Detected          | 24.6          | False Negative |
| URV-261                         | <i>Enterococcus faecalis</i> | 0.999                  | 0.895              | Detected         | Detected          | 16.26         | True Positive  |
| URV-272                         | <i>Enterococcus faecalis</i> | 0.999                  | 0.616              | Detected         | Detected          | 15.76         | True Positive  |
| URV-278                         | <i>Enterococcus faecalis</i> | 0.999                  | 0.663              | Detected         | Detected          | 16.33         | True Positive  |
| URV-280                         | <i>Enterococcus faecalis</i> | 0.999                  | 0.046              | Detected         | Detected          | 22.42         | True Positive  |
| URV-283                         | <i>Enterococcus faecalis</i> | 0.999                  | 0.756              | Detected         | Detected          | 22.47         | True Positive  |
| URV-288                         | <i>Enterococcus faecalis</i> | 0.999                  | 0.061              | Detected         | Detected          | 24.09         | True Positive  |
| URV-291                         | <i>Enterococcus faecalis</i> | 0.999                  | 0.133              | Detected         | Detected          | 17.96         | True Positive  |
| URV-111                         | <i>Escherichia coli</i>      | 0.999                  | 0.115              | Detected         | Detected          | 15.96         | True Positive  |
| URV-113                         | <i>Escherichia coli</i>      | 0.391                  | 0.025              | Not detected     | Detected          | 19.96         | False Negative |
| URV-114                         | <i>Escherichia coli</i>      | 0.998                  | 0.104              | Detected         | Detected          | 18.05         | True Positive  |
| URV-117                         | <i>Escherichia coli</i>      | 0.999                  | 0.020              | Detected         | Detected          | 18.10         | True Positive  |
| URV-130                         | <i>Escherichia coli</i>      | 0.999                  | 0.133              | Detected         | Detected          | 30.40         | True Positive  |
| URV-131                         | <i>Escherichia coli</i>      | 0.999                  | 0.840              | Detected         | Detected          | 17.06         | True Positive  |
| URV-137                         | <i>Escherichia coli</i>      | 0.020                  | 0.000              | Not detected     | Not_detected      | Undetermined  | True Negative  |
| URV-139                         | <i>Escherichia coli</i>      | 0.000                  | 0.000              | Not detected     | Not Detected      | Undetermined  | True Negative  |
| URV-141                         | <i>Escherichia coli</i>      | 0.000                  | 0.000              | Not detected     | Not Detected      | Undetermined  | True Negative  |
| URV-173                         | <i>Escherichia coli</i>      | 0.814                  | 0.043              | Detected         | Detected          | 19.11         | True Positive  |
| URV-178                         | <i>Escherichia coli</i>      | 0.971                  | 0.098              | Detected         | Detected          | 18.50         | True Positive  |
| URV-257                         | <i>Escherichia coli</i>      | 0.999                  | 0.027              | Detected         | Detected          | 21.83         | True Positive  |
| URV-258                         | <i>Escherichia coli</i>      | 0.999                  | 0.713              | Detected         | Detected          | 11.46         | True Positive  |
| URV-268                         | <i>Escherichia coli</i>      | 0.801                  | 0.041              | Detected         | Detected          | 22.08         | True Positive  |
| URV-280                         | <i>Escherichia coli</i>      | 0.997                  | 0.675              | Detected         | Detected          | 19.01         | True Positive  |
| URV-282                         | <i>Escherichia coli</i>      | 0.999                  | 0.057              | Detected         | Detected          | 26.26         | True Positive  |
| URV-289                         | <i>Escherichia coli</i>      | 0.999                  | 0.677              | Detected         | Detected          | 14.22         | True Positive  |

|         |                              |       |       |              |              |              |                |
|---------|------------------------------|-------|-------|--------------|--------------|--------------|----------------|
| URV-110 | <i>Klebsiella pneumoniae</i> | 0.801 | 0.012 | Detected     | Detected     | 15.81        | True Positive  |
| URV-122 | <i>Klebsiella pneumoniae</i> | 0.999 | 0.159 | Detected     | Detected     | 14.59        | True Positive  |
| URV-132 | <i>Klebsiella pneumoniae</i> | 0.046 | 0.000 | Detected     | Detected     | 37.81        | True Positive  |
| URV-147 | <i>Klebsiella pneumoniae</i> | 0.999 | 0.071 | Detected     | Detected     | 26.79        | True Positive  |
| URV-169 | <i>Klebsiella pneumoniae</i> | 0.953 | 0.043 | Detected     | Detected     | 14.82        | True Positive  |
| URV-184 | <i>Klebsiella pneumoniae</i> | 0.999 | 0.140 | Detected     | Detected     | 21.88        | True Positive  |
| URV-255 | <i>Klebsiella pneumoniae</i> | 0.781 | 0.002 | Detected     | Detected     | 25.35        | True Positive  |
| URV-262 | <i>Klebsiella pneumoniae</i> | 0.955 | 0.003 | Detected     | Detected     | 23.69        | True Positive  |
| URV-264 | <i>Klebsiella pneumoniae</i> | 0.422 | 0.004 | Not detected | Detected     | 21.42        | False Negative |
| URV-280 | <i>Klebsiella pneumoniae</i> | 0.801 | 0.011 | Detected     | Detected     | 25.16        | True Positive  |
| URV-289 | <i>Klebsiella pneumoniae</i> | 0.813 | 0.016 | Detected     | Detected     | 18.48        | True Positive  |
| URV-187 | <i>Proteus mirabilis</i>     | 0.895 | 0.008 | Detected     | Not Detected | Undetermined | False Positive |
| URV-192 | <i>Proteus mirabilis</i>     | 0.999 | 0.369 | Detected     | Detected     | 25.17        | True Positive  |
| URV-228 | <i>Proteus mirabilis</i>     | 0.999 | 0.069 | Detected     | Detected     | 21.74        | True Positive  |
| URV-231 | <i>Proteus mirabilis</i>     | 0.998 | 0.147 | Detected     | Detected     | 31.71        | True Positive  |
| URV-268 | <i>Proteus mirabilis</i>     | 0.998 | 0.075 | Detected     | Detected     | 34.07        | True Positive  |
| URV-291 | <i>Staphylococcus aureus</i> | 0.978 | 0.109 | Detected     | Not detected | Undetermined | False Positive |
| URV-118 | <i>Aerococcus urinae</i>     | 0.968 | 0.001 | Detected     | Detected     | 28.17        | True Positive  |
| URV-130 | <i>Aerococcus urinae</i>     | 0.662 | 0.001 | Detected     | Detected     | 23.52        | True Positive  |
| URV-139 | <i>Aerococcus urinae</i>     | 0.594 | 0.001 | Detected     | Detected     | 30.94        | True Positive  |
| URV-187 | <i>Aerococcus urinae</i>     | 0.986 | 0.005 | Detected     | Detected     | 26.56        | True Positive  |
| URV-284 | <i>Aerococcus urinae</i>     | 0.986 | 0.002 | Detected     | Detected     | 26.70        | True Positive  |
| URV-285 | <i>Aerococcus urinae</i>     | 0.802 | 0.001 | Detected     | Detected     | 23.11        | True Positive  |
| URV-287 | <i>Aerococcus urinae</i>     | 0.939 | 0.002 | Detected     | Detected     | 24.04        | True Positive  |
| URV-291 | <i>Aerococcus urinae</i>     | 0.967 | 0.001 | Detected     | Detected     | 19.91        | True Positive  |
| URV-108 | <i>Gardnerella vaginalis</i> | 0.684 | 0.002 | Detected     | Not Detected | Undetermined | False Positive |
| URV-114 | <i>Gardnerella vaginalis</i> | 0.930 | 0.028 | Detected     | Detected     | 18.83        | True Positive  |
| URV-125 | <i>Gardnerella vaginalis</i> | 0.948 | 0.142 | Detected     | Detected     | 36.87        | True Positive  |
| URV-128 | <i>Gardnerella vaginalis</i> | 0.696 | 0.029 | Detected     | Not Detected | Undetermined | False Positive |
| URV-136 | <i>Gardnerella vaginalis</i> | 0.859 | 0.003 | Detected     | Detected     | 26.86        | True Positive  |
| URV-140 | <i>Gardnerella vaginalis</i> | 0.934 | 0.084 | Detected     | Detected     | 22.10        | True Positive  |
| URV-163 | <i>Gardnerella vaginalis</i> | 0.875 | 0.030 | Detected     | Not Detected | Undetermined | False Positive |
| URV-167 | <i>Gardnerella vaginalis</i> | 0.964 | 0.004 | Detected     | 23.927       | 23.927       | True Positive  |
| URV-175 | <i>Gardnerella vaginalis</i> | 0.658 | 0.084 | Detected     | Not Detected | Undetermined | False Positive |
| URV-181 | <i>Gardnerella vaginalis</i> | 0.803 | 0.002 | Detected     | 21.28        | 21.28        | True Positive  |
| URV-191 | <i>Gardnerella vaginalis</i> | 0.738 | 0.098 | Detected     | 17.23        | 17.23        | True Positive  |
| URV-223 | <i>Gardnerella vaginalis</i> | 0.970 | 0.013 | Detected     | 31.97        | 31.97        | True Positive  |
| URV-233 | <i>Gardnerella vaginalis</i> | 0.944 | 0.083 | Detected     | 15.60        | 15.60        | True Positive  |
| URV-256 | <i>Gardnerella vaginalis</i> | 0.840 | 0.545 | Detected     | 20.08        | 20.08        | True Positive  |
| URV-263 | <i>Gardnerella vaginalis</i> | 0.994 | 0.011 | Detected     | 28.93        | 28.93        | True Positive  |
| URV-278 | <i>Gardnerella vaginalis</i> | 0.638 | 0.031 | Detected     | Not Detected | Undetermined | False Positive |
| URV-286 | <i>Gardnerella vaginalis</i> | 0.608 | 0.178 | Detected     | Not Detected | Undetermined | False Positive |
| URV-104 | <i>Prevotella species</i>    | 0.986 | 0.001 | Detected     | Detected     | 14.83        | True Positive  |
| URV-112 | <i>Prevotella species</i>    | 0.998 | 0.012 | Detected     | Detected     | 15.96        | True Positive  |
| URV-163 | <i>Prevotella species</i>    | 0.874 | 0.001 | Detected     | Detected     | 15.49        | True Positive  |
| URV-249 | <i>Prevotella species</i>    | 0.998 | 0.029 | Detected     | Detected     | 16.78        | True Positive  |
| URV-259 | <i>Prevotella species</i>    | 0.992 | 0.006 | Detected     | Detected     | 17.4         | True Positive  |
| URV-270 | <i>Prevotella species</i>    | 0.994 | 0.005 | Detected     | Detected     | 17.79        | True Positive  |
| URV-271 | <i>Prevotella species</i>    | 0.961 | 0.003 | Detected     | Detected     | 17.87        | True Positive  |

#### Sanger Sequencing Comparator Results

| Sample  | Analyte                       | Prediction Probability | Relative abundance | Biotia-ID Result | Comparator result | % Identity | Comparator Agreement |
|---------|-------------------------------|------------------------|--------------------|------------------|-------------------|------------|----------------------|
| URV-146 | <i>Enterococcus faecium</i>   | 0.998                  | 0.017              | Detected         | Detected          | 100%       | True Positive        |
| URV-225 | <i>Enterococcus faecium</i>   | 0.961                  | 0.624              | Detected         | Detected          | 100%       | True Positive        |
| URV-176 | <i>Morganella morganii</i>    | 0.988                  | 0.004              | Detected         | Detected          | 100%       | True Positive        |
| URV-272 | <i>Morganella morganii</i>    | 0.998                  | 0.013              | Detected         | Detected          | 100%       | True Positive        |
| URV-112 | <i>aphylococcus epidermid</i> | 0.828                  | 0.001              | Detected         | Detected          | 100%       | True Positive        |
| URV-116 | <i>aphylococcus epidermid</i> | 0.984                  | 0.005              | Detected         | Detected          | 99.50%     | True Positive        |

|         |                                 |       |       |          |              |         |                |
|---------|---------------------------------|-------|-------|----------|--------------|---------|----------------|
| URV-291 | <i>phylococcus saprophytic</i>  | 0.976 | 0.008 | Detected | Detected     | 99.25%  | True Positive  |
| URV-146 | <i>streptococcus agalactiae</i> | 0.999 | 0.122 | Detected | Detected     | 100%    | True Positive  |
| URV-167 | <i>streptococcus agalactiae</i> | 0.949 | 0.004 | Detected | Detected     | 100%    | True Positive  |
| URV-186 | <i>streptococcus agalactiae</i> | 0.930 | 0.003 | Detected | Detected     | 100%    | True Positive  |
| URV-232 | <i>streptococcus agalactiae</i> | 0.985 | 0.006 | Detected | Detected     | 100%    | True Positive  |
| URV-291 | ginosus group Streptoco         | 0.565 | 0.002 | Detected | Detected     | 100%    | True Positive  |
| URV-140 | ginosus group Streptoco         | 0.827 | 0.017 | Detected | Not Detected | NA      | False Positive |
| URV-275 | ginosus group Streptoco         | 0.515 | 0.002 | Detected | Not Detected | NA      | False Positive |
| URV-287 | ginosus group Streptoco         | 0.538 | 0.004 | Detected | Not Detected | NA      | False Positive |
| URV-154 | <i>rynebacterium urealyticu</i> | 0.998 | 0.024 | Detected | Detected     | 100%    | True Positive  |
| URV-227 | <i>rynebacterium urealyticu</i> | 0.963 | 0.002 | Detected | Detected     | 100%    | True Positive  |
| URV-287 | <i>rynebacterium urealyticu</i> | 0.549 | 0.000 | Detected | Detected     | 100%    | True Positive  |
| URV-288 | <i>rynebacterium urealyticu</i> | 0.645 | 0.001 | Detected | Detected     | 100%    | True Positive  |
| URV-225 | <i>Candida albicans</i>         | 0.980 | 0.042 | Detected | Detected     | 100%    | True Positive  |
| URV-230 | <i>Candida albicans</i>         | 0.980 | 0.314 | Detected | Detected     | 100%    | True Positive  |
| URV-233 | <i>Candida albicans</i>         | 0.986 | 0.087 | Detected | Detected     | 99.8%   | True Positive  |
| URV-260 | <i>Candida albicans</i>         | 0.943 | 0.019 | Detected | Detected     | 100%    | True Positive  |
| URV-278 | <i>Candida albicans</i>         | 0.996 | 0.081 | Detected | Detected     | 97.50%  | True Positive  |
| SBU-103 | <i>Candida albicans</i>         | 0.998 | 0.171 | Detected | Detected     | 99.8%   | True Positive  |
| SBU-161 | <i>Candida albicans</i>         | 0.598 | 0.017 | Detected | Detected     | 99.8%   | True Positive  |
| SBU-176 | <i>Candida albicans</i>         | 0.963 | 0.378 | Detected | Detected     | 100.0%  | True Positive  |
| URV-148 | <i>Candida glabrata</i>         | 0.982 | 0.679 | Detected | Detected     | 99.9%   | True Positive  |
| URV-182 | <i>Candida glabrata</i>         | 0.982 | 0.314 | Detected | Detected     | 98.70%  | True Positive  |
| URV-262 | <i>Candida glabrata</i>         | 0.982 | 0.661 | Detected | Detected     | 99.9%   | True Positive  |
| URV-288 | <i>Candida glabrata</i>         | 0.991 | 0.047 | Detected | Detected     | 99.90%  | True Positive  |
| SBU-021 | <i>Candida glabrata</i>         | 0.974 | 0.347 | Detected | Detected     | 100.00% | True Positive  |
| SBU-047 | <i>Candida glabrata</i>         | 0.972 | 0.305 | Detected | Detected     | 99.80%  | True Positive  |
| SBU-137 | <i>Candida glabrata</i>         | 0.967 | 0.016 | Detected | Detected     | 99.88%  | True Positive  |
| SBU-162 | <i>Candida glabrata</i>         | 0.981 | 0.075 | Detected | Detected     | 99.76%  | True Positive  |
| SBU-017 | <i>Candida tropicalis</i>       | 0.733 | 0.108 | Detected | Detected     | 99.80%  | True Positive  |
| SBU-018 | <i>Candida tropicalis</i>       | 0.988 | 0.392 | Detected | Detected     | 100.00% | True Positive  |
| SBU-027 | <i>Candida tropicalis</i>       | 0.977 | 0.269 | Detected | Detected     | 99.80%  | True Positive  |
| SBU-074 | <i>Candida tropicalis</i>       | 0.577 | 0.171 | Detected | Detected     | 98.80%  | True Positive  |
| SBU-017 | <i>Candida krusei</i>           | 0.696 | 0.058 | Detected | Detected     | 100%    | True Positive  |

**Supplementary Table 6A.** Performance Characteristics fo Key Bacterial Urogenital Taxa Reported with BIOTIA-ID

| Key pathogen                      | Method           | TP  | TN   | FN | FP | Total | Sensitivity | Specificity |
|-----------------------------------|------------------|-----|------|----|----|-------|-------------|-------------|
| <i>Escherichia coli</i>           | Clinical         | 39  | 204  | 1  | 1  | 245   | 97.50%      | 99.51%      |
|                                   | Contrived        | 157 | 1096 | 0  | 13 | 1266  | 100.00%     | 98.83%      |
|                                   | <i>in silico</i> | 3   | 8239 | 0  | 24 | 8266  | 100.00%     | 99.71%      |
|                                   | Total            | 199 | 9539 | 1  | 38 | 9777  | 99.50%      | 99.60%      |
| <i>Klebsiella pneumoniae</i>      | Clinical         | 28  | 214  | 2  | 1  | 245   | 93.33%      | 99.53%      |
|                                   | Contrived        | 166 | 1099 | 0  | 1  | 1266  | 100.00%     | 99.91%      |
|                                   | <i>in silico</i> | 3   | 8250 | 0  | 13 | 8266  | 100.00%     | 99.84%      |
|                                   | Total            | 197 | 9563 | 2  | 15 | 9777  | 98.99%      | 99.84%      |
| <i>Proteus mirabilis</i>          | Clinical         | 22  | 222  | 0  | 1  | 245   | 100.00%     | 99.55%      |
|                                   | Contrived        | 163 | 1103 | 0  | 0  | 1266  | 100.00%     | 100.00%     |
|                                   | <i>in silico</i> | 3   | 8255 | 0  | 8  | 8266  | 100.00%     | 99.90%      |
|                                   | Total            | 188 | 9580 | 0  | 9  | 9777  | 100.00%     | 99.91%      |
| <i>Enterococcus faecalis</i>      | Clinical         | 61  | 181  | 2  | 1  | 245   | 96.83%      | 99.45%      |
|                                   | Contrived        | 147 | 1119 | 0  | 0  | 1266  | 100.00%     | 100.00%     |
|                                   | <i>in silico</i> | 3   | 8263 | 0  | 0  | 8266  | 100.00%     | 100.00%     |
|                                   | Total            | 211 | 9563 | 2  | 1  | 9777  | 99.06%      | 99.99%      |
| <i>Staphylococcus aureus</i>      | Clinical         | 2   | 242  | 0  | 1  | 245   | 100.00%     | 99.59%      |
|                                   | Contrived        | 172 | 1094 | 0  | 0  | 1266  | 100.00%     | 100.00%     |
|                                   | <i>in silico</i> | 3   | 8252 | 0  | 11 | 8266  | 100.00%     | 99.87%      |
|                                   | Total            | 177 | 9588 | 0  | 12 | 9777  | 100.00%     | 99.88%      |
| <i>Citrobacter species</i>        | Clinical         | 0   | 243  | 0  | 2  | 245   | -           | 99.18%      |
|                                   | Contrived        | 2   | 1264 | 0  | 0  | 1266  | 100.00%     | 100.00%     |
|                                   | <i>in silico</i> | 20  | 8246 | 0  | 0  | 8266  | 100.0%      | 100.0%      |
|                                   | Total            | 22  | 9753 | 0  | 2  | 9777  | 100.00%     | 99.98%      |
| <i>Enterobacter aerogenes</i>     | Clinical         | 0   | 244  | 1  | 0  | 245   | 0.00%       | 100.00%     |
|                                   | Contrived        | 1   | 1265 | 0  | 0  | 1266  | 100.00%     | 100.00%     |
|                                   | <i>in silico</i> | 3   | 8263 | 0  | 0  | 8266  | 100.00%     | 100.00%     |
|                                   | Total            | 4   | 9772 | 1  | 0  | 9777  | 80.00%      | 100.00%     |
| <i>Enterobacter cloacae</i>       | Clinical         | 0   | 245  | 0  | 0  | 245   | -           | 100.00%     |
|                                   | Contrived        | 1   | 1265 | 0  | 0  | 1266  | 100.00%     | 100.00%     |
|                                   | <i>in silico</i> | 3   | 8253 | 0  | 10 | 8266  | 100.00%     | 99.88%      |
|                                   | Total            | 4   | 9763 | 0  | 10 | 9777  | 100.00%     | 99.90%      |
| <i>Klebsiella oxytoca</i>         | Clinical         | 0   | 244  | 0  | 1  | 245   | -           | 99.59%      |
|                                   | Contrived        | 1   | 1265 | 0  | 0  | 1266  | 100.00%     | 100.00%     |
|                                   | <i>in silico</i> | 3   | 8260 | 0  | 3  | 8266  | 100.00%     | 99.96%      |
|                                   | Total            | 4   | 9769 | 0  | 4  | 9777  | 100.00%     | 99.96%      |
| <i>Klebsiella variicola</i>       | Clinical         | 1   | 242  | 0  | 2  | 245   | 100.00%     | 99.18%      |
|                                   | Contrived        | 1   | 1265 | 0  | 0  | 1266  | 100.00%     | 100.00%     |
|                                   | <i>in silico</i> | 3   | 8260 | 0  | 3  | 8266  | 100.00%     | 99.96%      |
|                                   | Total            | 5   | 9767 | 0  | 5  | 9777  | 100.00%     | 99.95%      |
| <i>Morganella morganii</i>        | Clinical         | 2   | 243  | 0  | 0  | 245   | 100.00%     | 100.00%     |
|                                   | Contrived        | 2   | 1264 | 0  | 0  | 1266  | 100.00%     | 100.00%     |
|                                   | <i>in silico</i> | 3   | 8262 | 0  | 1  | 8266  | 100.00%     | 99.99%      |
|                                   | Total            | 7   | 9769 | 0  | 1  | 9777  | 100.00%     | 99.99%      |
| <i>Proteus vulgaris</i>           | Clinical         | 0   | 244  | 1  | 0  | 245   | 0.00%       | 100.00%     |
|                                   | Contrived        | 1   | 1265 | 0  | 0  | 1266  | 100.00%     | 100.00%     |
|                                   | <i>in silico</i> | 3   | 8256 | 0  | 7  | 8266  | 100.00%     | 99.92%      |
|                                   | Total            | 4   | 9765 | 1  | 7  | 9777  | 80.00%      | 99.93%      |
| <i>Providencia rettgeri</i>       | Clinical         | 0   | 244  | 0  | 1  | 245   | -           | 99.59%      |
|                                   | Contrived        | 1   | 1265 | 0  | 0  | 1266  | 100.00%     | 100.00%     |
|                                   | <i>in silico</i> | 3   | 8260 | 0  | 3  | 8266  | 100.00%     | 99.96%      |
|                                   | Total            | 4   | 9769 | 0  | 4  | 9777  | 100.00%     | 99.96%      |
| <i>Providencia stuartii</i>       | Clinical         | 0   | 244  | 0  | 1  | 245   | -           | 99.59%      |
|                                   | Contrived        | 1   | 1265 | 0  | 0  | 1266  | 100.00%     | 100.00%     |
|                                   | <i>in silico</i> | 3   | 8260 | 0  | 3  | 8266  | 100.00%     | 99.96%      |
|                                   | Total            | 4   | 9769 | 0  | 4  | 9777  | 100.00%     | 99.96%      |
| <i>Raoultella ornithinolytica</i> | Clinical         | 0   | 245  | 0  | 0  | 245   | -           | 100.00%     |
|                                   | Contrived        | 1   | 1265 | 0  | 0  | 1266  | 100.00%     | 100.00%     |
|                                   | <i>in silico</i> | 3   | 8260 | 0  | 3  | 8266  | 100.00%     | 99.96%      |
|                                   | Total            | 4   | 9770 | 0  | 3  | 9777  | 100.00%     | 99.97%      |
| <i>Serratia marcescens</i>        | Clinical         | 0   | 245  | 0  | 0  | 245   | -           | 100.00%     |
|                                   | Contrived        | 1   | 1265 | 0  | 0  | 1266  | 100.00%     | 100.00%     |
|                                   | <i>in silico</i> | 3   | 8245 | 0  | 18 | 8266  | 100.00%     | 99.78%      |
|                                   | Total            | 4   | 9755 | 0  | 18 | 9777  | 100.00%     | 99.82%      |
| <i>Acinetobacter baumannii</i>    | Clinical         | 0   | 244  | 0  | 1  | 245   | -           | 99.59%      |
|                                   | Contrived        | 4   | 1262 | 0  | 0  | 1266  | 100.00%     | 100.00%     |
|                                   | <i>in silico</i> | 3   | 8244 | 0  | 19 | 8266  | 100.00%     | 99.77%      |
|                                   | Total            | 7   | 9750 | 0  | 20 | 9777  | 100.00%     | 99.80%      |
|                                   | Clinical         | 0   | 245  | 0  | 0  | 245   | -           | 100.00%     |

|                                      |                  |      |      |   |    |      |         |         |
|--------------------------------------|------------------|------|------|---|----|------|---------|---------|
| <i>Acinetobacter lwoffii</i>         | Contrived        | 1    | 1265 | 0 | 0  | 1266 | 100.00% | 100.00% |
|                                      | <i>in silico</i> | 3    | 8260 | 0 | 3  | 8266 | 100.0%  | 100.0%  |
|                                      | Total            | 4    | 9770 | 0 | 3  | 9777 | 100.00% | 99.97%  |
| <i>Pseudomonas aeruginosa</i>        | Clinical         | 0    | 244  | 0 | 1  | 245  | -       | 100%    |
|                                      | Contrived        | 7    | 1259 | 0 | 0  | 1266 | 100.00% | 100.00% |
|                                      | <i>in silico</i> | 3    | 8260 | 0 | 3  | 8266 | 100.0%  | 100.0%  |
|                                      | Total            | 10   | 9763 | 0 | 4  | 9777 | 100.00% | 99.96%  |
| <i>Strenotrophomonas maltophilia</i> | Clinical         | 0    | 244  | 0 | 1  | 245  | -       | 100%    |
|                                      | Contrived        | 1    | 1265 | 0 | 0  | 1266 | 100.00% | 100.00% |
|                                      | <i>in silico</i> | 3    | 8252 | 0 | 11 | 8266 | 100.0%  | 100.0%  |
|                                      | Total            | 4    | 9761 | 0 | 12 | 9777 | 100.00% | 99.88%  |
| <i>Aerococcus</i> species            | Clinical         | 8    | 237  | 0 | 0  | 245  | 100.00% | 100.00% |
|                                      | Contrived        | 2    | 1264 | 0 | 0  | 1266 | 100.00% | 100.00% |
|                                      | <i>in silico</i> | 21   | 8242 | 3 | 0  | 8266 | 87.50%  | 100.00% |
|                                      | Total            | 31   | 9743 | 3 | 0  | 9777 | 91.18%  | 100.00% |
| Anginosus group Streptococci         | Clinical         | 1    | 235  | 0 | 9  | 245  | 100.00% | 96.31%  |
|                                      | Contrived        | 1    | 1265 | 0 | 0  | 1266 | 100.00% | 100.00% |
|                                      | <i>in silico</i> | 5    | 8261 | 0 | 0  | 8266 | 100.00% | 100.00% |
|                                      | Total            | 7    | 9761 | 0 | 9  | 9777 | 100.00% | 99.91%  |
| <i>Corynebacterium urealyticum</i>   | Clinical         | 4    | 241  | 0 | 0  | 245  | 100.00% | 100.00% |
|                                      | Contrived        | 1    | 1265 | 0 | 0  | 1266 | 100.00% | 100.00% |
|                                      | <i>in silico</i> | 3    | 8263 | 0 | 0  | 8266 | 100.00% | 100.00% |
|                                      | Total            | 8    | 9769 | 0 | 0  | 9777 | 100.00% | 100.00% |
| <i>Enterococcus faecium</i>          | Clinical         | 2    | 241  | 0 | 2  | 245  | 100.00% | 99.18%  |
|                                      | Contrived        | 1    | 1003 | 0 | 0  | 1004 | 100.00% | 100.00% |
|                                      | <i>in silico</i> | 3    | 8260 | 0 | 3  | 8266 | 100.00% | 99.96%  |
|                                      | Total            | 6    | 9504 | 0 | 5  | 9515 | 100.00% | 99.95%  |
| Mitis group Streptococci             | Clinical         | 0    | 245  | 0 | 0  | 245  | -       | 100.00% |
|                                      | Contrived        | 1    | 1265 | 0 | 0  | 1266 | 100.00% | 100.00% |
|                                      | <i>in silico</i> | 3    | 8262 | 0 | 1  | 8266 | 100.00% | 99.99%  |
|                                      | Total            | 4    | 9772 | 0 | 1  | 9777 | 100.00% | 99.99%  |
| <i>Staphylococcus epidermidis</i>    | Clinical         | 2    | 242  | 0 | 1  | 245  | 100.00% | 99.59%  |
|                                      | Contrived        | 5    | 1261 | 0 | 0  | 1266 | 100.00% | 100.00% |
|                                      | <i>in silico</i> | 3    | 8263 | 0 | 0  | 8266 | 100.00% | 100.00% |
|                                      | Total            | 10   | 9766 | 0 | 1  | 9777 | 100.00% | 99.99%  |
| <i>Staphylococcus lugdunensis</i>    | Clinical         | 0    | 245  | 0 | 0  | 245  | -       | 100.00% |
|                                      | Contrived        | 1    | 1265 | 0 | 0  | 1266 | 100.00% | 100.00% |
|                                      | <i>in silico</i> | 3    | 8263 | 0 | 0  | 8266 | 100.00% | 100.00% |
|                                      | Total            | 4    | 9773 | 0 | 0  | 9777 | 100.00% | 100.00% |
| <i>Staphylococcus saprophyticus</i>  | Clinical         | 1    | 242  | 0 | 2  | 245  | 100.00% | 99.18%  |
|                                      | Contrived        | 1    | 1265 | 0 | 0  | 1266 | 100.00% | 100.00% |
|                                      | <i>in silico</i> | 3    | 8263 | 0 | 0  | 8266 | 100.00% | 100.00% |
|                                      | Total            | 5    | 9770 | 0 | 2  | 9777 | 100.00% | 99.98%  |
| Other Staphylococci                  | Clinical         | 0    | 245  | 0 | 0  | 245  | -       | 100.00% |
|                                      | Contrived        | 9    | 1257 | 0 | 0  | 1266 | 100.00% | 100.00% |
|                                      | <i>in silico</i> | 3    | 8263 | 0 | 0  | 8266 | 100.00% | 100.00% |
|                                      | Total            | 12   | 9765 | 0 | 0  | 9777 | 100.00% | 100.00% |
| <i>Streptococcus agalactiae</i>      | Clinical         | 4    | 241  | 0 | 0  | 245  | 100.00% | 100.00% |
|                                      | Contrived        | 1    | 1265 | 0 | 0  | 1266 | 100.00% | 100.00% |
|                                      | <i>in silico</i> | 3    | 8263 | 0 | 0  | 8266 | 100.00% | 100.00% |
|                                      | Total            | 8    | 9769 | 0 | 0  | 9777 | 100.00% | 100.00% |
| <i>Anaerococcus vaginalis</i>        | Clinical         | 0    | 245  | 0 | 0  | 245  | -       | 100.00% |
|                                      | Contrived        | 1    | 1265 | 0 | 0  | 1266 | 100.00% | 100.00% |
|                                      | <i>in silico</i> | 3    | 8263 | 0 | 0  | 8266 | 100.00% | 100.00% |
|                                      | Total            | 4    | 9773 | 0 | 0  | 9777 | 100.00% | 100.00% |
| <i>Bacteroides fragilis</i>          | Clinical         | 0    | 245  | 0 | 0  | 245  | -       | 100.00% |
|                                      | Contrived        | 7    | 1259 | 0 | 0  | 1266 | 100.00% | 100.00% |
|                                      | <i>in silico</i> | 3    | 8263 | 0 | 0  | 8266 | 100.00% | 100.00% |
|                                      | Total            | 10   | 9767 | 0 | 0  | 9777 | 100.00% | 100.00% |
| <i>Prevotella</i> species            | Clinical         | 7    | 238  | 0 | 0  | 245  | 100.00% | 100.00% |
|                                      | Contrived        | 7    | 1259 | 0 | 0  | 1266 | 100.00% | 100.00% |
|                                      | <i>in silico</i> | 9    | 8257 | 0 | 0  | 8266 | 100.00% | 100.00% |
|                                      | Total            | 23   | 9754 | 0 | 0  | 9777 | 100.00% | 100.00% |
| <i>Gardnerella vaginalis</i>         | Clinical         | 11   | 228  | 0 | 6  | 245  | 100.00% | 97.44%  |
|                                      | Contrived        | 7    | 1259 | 0 | 0  | 1266 | 100.00% | 100.00% |
|                                      | <i>in silico</i> | 3    | 8263 | 0 | 0  | 8266 | 100.00% | 100.00% |
|                                      | Total            | 21   | 9750 | 0 | 6  | 9777 | 100.00% | 99.94%  |
| Negative Organisms                   | Clinical         | 15   | 230  | 0 | 0  | 245  | 100.00% | 100.00% |
|                                      | Contrived        | 223  | 1230 | 0 | 0  | 1266 | 100.00% | 100.00% |
|                                      | <i>in silico</i> | 7977 | 289  | 0 | 0  | 8266 | 100.00% | 100.00% |
|                                      | Total            | 8215 | 1749 | 0 | 0  | 9777 | 100.00% | 100.00% |

Supplementary Table 6B. Performance Characteristics fo Key Fungal Urogenital Taxa Reported with BIOTIA-ID

| Key pathogen                  | Method           | TP   | TN   | FN | FP | Total | Sensitivity | Specificity |
|-------------------------------|------------------|------|------|----|----|-------|-------------|-------------|
| <i>Candida albicans</i>       | Clinical         | 8    | 28   | 0  | 0  | 36    | 100.0%      | 100.0%      |
|                               | Contrived        | 132  | 795  | 1  | 0  | 928   | 99.2%       | 100.0%      |
|                               | <i>in silico</i> | 9    | 4133 | 0  | 0  | 4142  | 100.0%      | 100.0%      |
|                               | Total            | 149  | 4956 | 1  | 0  | 5106  | 99.3%       | 100.0%      |
| <i>Candida auris</i>          | Clinical         | 0    | 36   | 0  | 0  | 36    | -           | 100.0%      |
|                               | Contrived        | 129  | 797  | 0  | 2  | 928   | 100.0%      | 99.7%       |
|                               | <i>in silico</i> | 9    | 4133 | 0  | 0  | 4142  | 100.0%      | 100.0%      |
|                               | Total            | 138  | 4966 | 0  | 2  | 5106  | 100.0%      | 100.0%      |
| <i>Candida dubliniensis</i>   | Clinical         | 0    | 36   | 0  | 0  | 36    | -           | 100.0%      |
|                               | Contrived        | 10   | 914  | 0  | 0  | 924   | 100.0%      | 100.0%      |
|                               | <i>in silico</i> | 9    | 4133 | 0  | 0  | 4142  | 100.0%      | 100.0%      |
|                               | Total            | 19   | 5083 | 0  | 0  | 5102  | 100.0%      | 100.0%      |
| <i>Candida glabrata</i>       | Clinical         | 8    | 28   | 0  | 0  | 36    | 100.0%      | 100.0%      |
|                               | Contrived        | 135  | 793  | 0  | 0  | 928   | 100.0%      | 100.0%      |
|                               | <i>in silico</i> | 9    | 4133 | 0  | 0  | 4142  | 100.0%      | 100.0%      |
|                               | Total            | 152  | 4954 | 0  | 0  | 5106  | 100.0%      | 100.0%      |
| <i>Candida guilliermondii</i> | Clinical         | 0    | 36   | 0  | 0  | 36    | -           | 100.0%      |
|                               | Contrived        | 10   | 918  | 0  | 0  | 928   | 100.0%      | 100.0%      |
|                               | <i>in silico</i> | 9    | 4133 | 0  | 0  | 4142  | 100.0%      | 100.0%      |
|                               | Total            | 19   | 5087 | 0  | 0  | 5106  | 100.0%      | 100.0%      |
| <i>Candida kefyr</i>          | Clinical         | 0    | 36   | 0  | 0  | 36    | -           | 100.0%      |
|                               | Contrived        | 10   | 918  | 0  | 0  | 928   | 100.0%      | 100.0%      |
|                               | <i>in silico</i> | 9    | 4133 | 0  | 0  | 4142  | 100.0%      | 100.0%      |
|                               | Total            | 19   | 5087 | 0  | 0  | 5106  | 100.0%      | 100.0%      |
| <i>Candida krusei</i>         | Clinical         | 1    | 35   | 0  | 0  | 36    | -           | 100.0%      |
|                               | Contrived        | 137  | 791  | 0  | 0  | 928   | 100.0%      | 100.0%      |
|                               | <i>in silico</i> | 9    | 4133 | 0  | 0  | 4142  | 100.0%      | 100.0%      |
|                               | Total            | 147  | 4959 | 0  | 0  | 5106  | 100.0%      | 100.0%      |
| <i>Candida lusitanae</i>      | Clinical         | 0    | 36   | 0  | 0  | 36    | -           | 100.0%      |
|                               | Contrived        | 10   | 882  | 0  | 0  | 928   | 100.0%      | 100.0%      |
|                               | <i>in silico</i> | 9    | 4133 | 0  | 0  | 4142  | 100.0%      | 100.0%      |
|                               | Total            | 19   | 5051 | 0  | 0  | 5106  | 100.0%      | 100.0%      |
| <i>Candida parapsilosis</i>   | Clinical         | 0    | 36   | 0  | 0  | 36    | -           | 100.0%      |
|                               | Contrived        | 139  | 789  | 0  | 0  | 928   | 100.0%      | 100.0%      |
|                               | <i>in silico</i> | 9    | 4133 | 0  | 0  | 4142  | 100.0%      | 100.0%      |
|                               | Total            | 148  | 4958 | 0  | 0  | 5106  | 100.0%      | 100.0%      |
| <i>Candida tropicalis</i>     | Clinical         | 4    | 32   | 0  | 0  | 36    | 100.0%      | 100.0%      |
|                               | Contrived        | 134  | 794  | 0  | 0  | 928   | 100.0%      | 100.0%      |
|                               | <i>in silico</i> | 9    | 4133 | 0  | 0  | 4142  | 100.0%      | 100.0%      |
|                               | Total            | 147  | 4959 | 0  | 0  | 5106  | 100.0%      | 100.0%      |
| Negative Organisms            | Clinical         | 9    | 191  | 0  | 0  | 200   | 100.0%      | 100.0%      |
|                               | Contrived        | 79   | 849  | 0  | 0  | 928   | 100.0%      | 100.0%      |
|                               | <i>in silico</i> | 4052 | 90   | 0  | 0  | 4142  | 100.0%      | 100.0%      |
|                               | Total            | 4140 | 1130 | 0  | 0  | 5270  | 100.0%      | 100.0%      |
